Retraction

## Retraction: Inhibition of microRNA-218 reduces HIF-1 $\alpha$ by targeting on Robo1 in mice aortic endothelial cells under intermittent hypoxia

Kai-Xiong Liu<sup>1,2,3</sup>, Qin Chen<sup>4</sup>, Gong-Ping Chen<sup>1,2,3</sup>, Jian-Chai Huang<sup>1,2,3</sup>, Jie-Feng Huang<sup>1,2,3</sup>, Xin-Ru He<sup>1,2,3</sup>, Ting Lin<sup>1,2,3</sup> and Qi-Chang Lin<sup>1,2,3</sup>

<sup>1</sup>Department of Respiratory Disease, The First Affiliated Hospital, Fujian Medical University, China

<sup>2</sup>Laboratory of Respiratory Disease of Fujian Medical University, Fuzhou, China

<sup>3</sup>Fujian Provincial Sleep-disordered Breathing Clinic Center, Fuzhou, China

<sup>4</sup>Integrated Chinese and Western Medicine Colleges, Fujian University of Traditional Chinese Medicine, Fuzhou, China

**Published:** May 26, 2023

**Copyright:** © 2023 Liu et al. This is an open access article distributed under the terms of the [Creative Commons Attribution License](#) (CC BY 3.0), which permits unrestricted use, distribution, and reproduction in any medium, provided the original author and source are credited.

**This article has been retracted:** Images in Figure 4A are duplicates of those that appear in Figure 3B-1 and 5B-2 of an earlier published paper [1]. In addition, there are multiple internal image duplications. The authors were also unable to replicate certain experimental results. In light of this, all authors have agreed to the retraction of this paper from Oncotarget.

### REFERENCES

1. Mao F, Zhang L, Cai MH, Guo H, Yuan HH. Leonurine hydrochloride induces apoptosis of H292 lung cancer cell by a mitochondria-dependent pathway. *Pharm Biol.* 2015; 53:1684–90. <https://doi.org/10.3109/13880209.2014.1001406>. [PubMed]

Original article: *Oncotarget.* 2017; 8:104359–104366. <https://doi.org/10.18632/oncotarget.22239>
